# Supplementary material for: Monitoring newt communities in urban area using eDNA metabarcoding
Source: PeerJ journal article supplement (doi:10.7717/peerj.12357), 2021-11-26

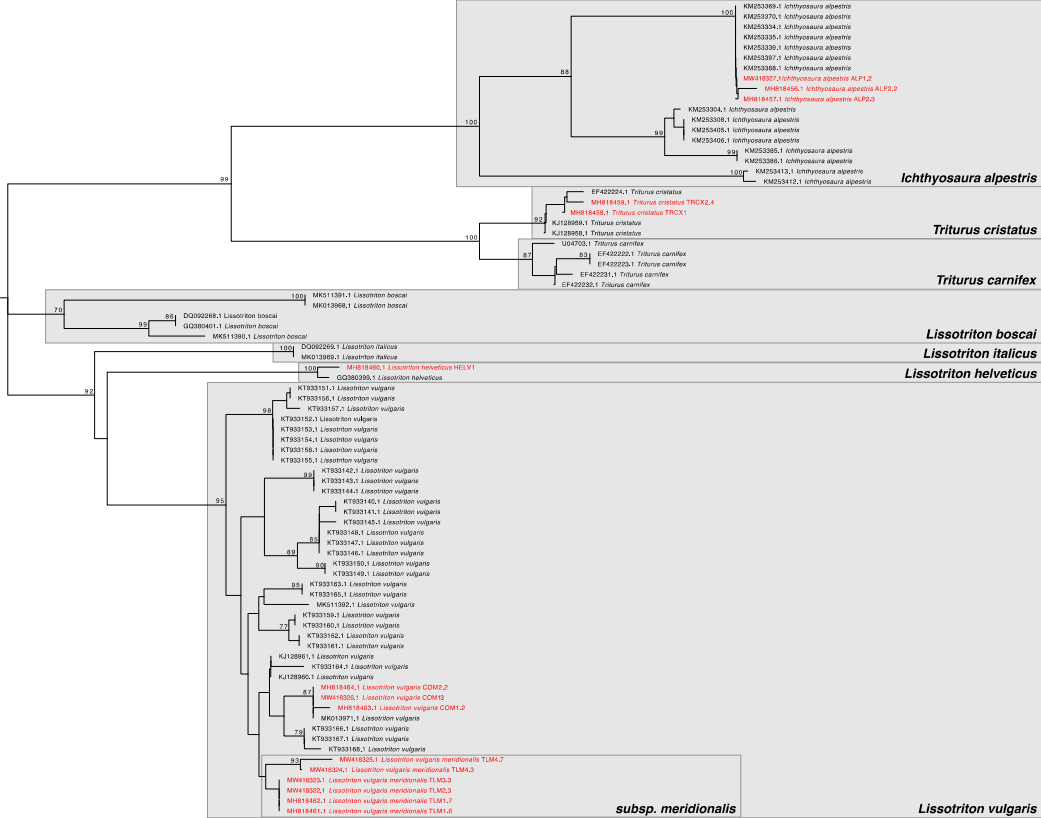

Supplement: Supplemental_Figure1.pdf [file Supplemental_Figure1.pdf]
