# Supplementary material for: Monitoring newt communities in urban area using eDNA metabarcoding
Source: PeerJ journal article supplement (doi:10.7717/peerj.12357), 2021-11-26
Supplement: Supplemental_Figure2.pdf [file Supplemental_Figure2.pdf]

# Map of Europe

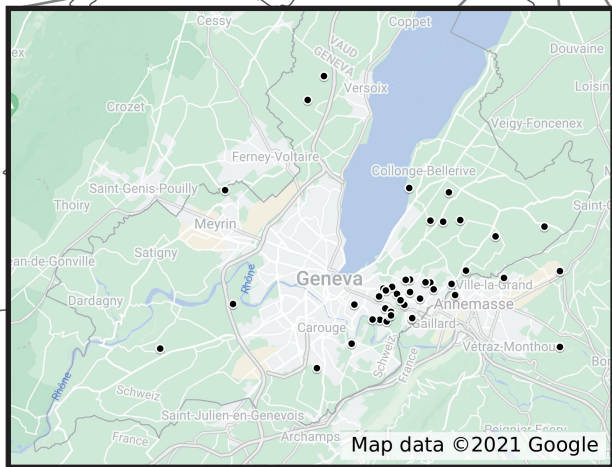

**Area of study**  
**Geneva, Switzerland**
